1     **Molecular Analysis of Parasites in the Choreocolacaceae (Rhodophyta) Reveals a**  
2     **Reduced *Harveyella mirabilis* Plastid Genome and Supports the Transfer of Genera**  
3                     **to the Rhodomelaceae (Rhodophyta)**

4

5

6

*Eric D. Salomaki*<sup>2</sup>

7

Department of Biological Sciences, University of Rhode Island, Kingston, RI, USA.

8

9

*Gary W. Saunders*

10

Centre for Environmental and Molecular Algal Research, Department of Biology,

11

University of New Brunswick, Fredericton, NB, E3B 5A3, Canada.

12

13

*Christopher E. Lane*

14

Department of Biological Sciences, University of Rhode Island, Kingston, RI, USA.

15

16

17

<sup>1</sup>Received.

18

<sup>2</sup>Author for correspondence: email [eric.salomaki@gmail.com](mailto:eric.salomaki@gmail.com).

19

Running Title: *Alloparasite plastid from Harveyella mirabilis*

20 **Abstract:**

21 Parasitism is a life strategy that has repeatedly evolved within the  
22 Florideophyceae. Until recently, the accepted paradigm of red algal parasite evolution  
23 was that parasites arise by first infecting a close relative and, either through host jumping  
24 or diversification, adapt to infect more distant relatives. The terms adelphoparasite and  
25 alloparasite have been used to distinguish parasites that are closely related to their hosts  
26 from those more distantly related to their hosts, respectively. Phylogenetic studies have  
27 cast doubt on the utility of these terms as data show that even alloparasites predominately  
28 infect with the same family. All adelphoparasites that have been investigated have lost a  
29 native plastid and instead hijack and incorporate a copy of their hosts' plastid when  
30 packaging spores. In contrast, a highly reduced plastid that has lost all genes involved  
31 with photosynthesis was sequenced from the alloparasite *Choreocolax polysiphoniae*,  
32 which indicates that it did not pass through an adelphoparasite stage. In this study we  
33 investigate whether other species in the Choreocolacaceae, a family of alloparasites, also  
34 retains its native plastid, as well as test the hypothesis that alloparasites can arise and  
35 subsequently speciate to form monophyletic clades that infect a range of hosts. We  
36 present the plastid genome for *Harveyella mirabilis* which, similar to that of *C.*  
37 *polysiphoniae*, has lost genes involved in photosynthesis. The *H. mirabilis* plastid shares  
38 more synteny with free-living red algal plastids than that of *C. polysiphoniae*  
39 Phylogenetic analysis identifies a well-supported monophyletic clade of parasites in the  
40 Choreocolacaceae, which retain their own plastid genomes, within the Rhodomelaceae.  
41 We therefore transfer genera in the Choreocolacaceae to the Rhodomelaceae.  
42 **Keywords:** Alloparasite, Adelphoparasite, *Choreocolax*, *Leachiella*

43

44 **INTRODUCTION:**

45         Since the 1845, when *Microcolax botryocarpa* Hooker & Harvey, became the  
46 first formally described parasitic red alga, the known biodiversity of red algal parasites  
47 has been steadily increasing (Reinsch 1875, Setchell 1914, 1923, Goff 1982, Preuss et al.  
48 2017). Red algal parasites exclusively infect other rhodophytes and are predominately  
49 unpigmented, appearing as galls or irregular growths on their free-living red algal hosts.  
50 Recent counts have identified 121 distinct species of red algal parasites distributed across  
51 eight different orders of the Florideophyceae (Salomaki and Lane 2014, Blouin and Lane  
52 2015, Preuss et al. 2017). Florideophyceae seem to be prone to adopting parasitism, in  
53 large part due to their ability to form direct cell-to-cell fusions between adjacent, non  
54 daughter cells (Wetherbee and Quirk 1982, Goff and Coleman 1985). With few  
55 exceptions [e.g. *Choreonema thuretii* (Broadwater and LaPointe 1997)], red algal  
56 parasites leverage their ability to form cell fusions as a means of infecting their host  
57 (Goff and Coleman 1985, Zuccarello et al. 2004).

58         Two main hypotheses have been proposed for the origin of red algal parasites.  
59 Setchell (1918) initially proposed that parasites arose as spores from their host, which had  
60 mutated to no longer be capable of photosynthesis. Sturch (1926) later proposed that  
61 parasites evolved from epiphytes that penetrated and, over time, became nutritionally  
62 reliant on the host. Feldmann and Feldmann (1958) later added to Sturch's hypothesis by  
63 suggesting that epiphytes that are closely related to their hosts are more likely to succeed  
64 in forming secondary pit connections and therefore increase the likelihood of successfully  
65 establishing a parasitic relationship.

66           Despite their diminutive habit, parasitic red algae share morphological  
67 characteristics with other close relatives, and thus were assigned to tribes or families at  
68 the time of their initial discovery (Reinsch 1875, Feldmann and Feldmann 1958).  
69 Historically parasites that have infected close relatives have been considered  
70 ‘adelphoparasites’, while those more distantly related to their hosts are called  
71 ‘alloparasites’ (Feldmann and Feldmann 1958, Goff et al. 1996). Approximately 80% of  
72 the described red algal parasite diversity is considered to be adelphoparasitic, while the  
73 remaining 20% is alloparasitic (Goff 1982, Salomaki and Lane 2014, Blouin and Lane  
74 2015). Based initially on morphological observations, and later coupled with molecular  
75 data, it was proposed that parasites evolve sympatrically with their hosts, as  
76 adelphoparasites, and over time diversify or adapt to infect new and more distantly  
77 related hosts, becoming alloparasites (Feldmann and Feldmann 1958, Goff et al. 1997).

78           Sturch (1926) initially described the family Choreocolacaceae as a family in the  
79 Gigartinales, which consisted of morphologically reduced parasites lacking chlorophyll  
80 including members of the genera *Choreocolax*, *Harveyella*, and *Holmsella*. The  
81 Choreocolacaceae was the subject of a thorough phylogenetic analysis of alloparasites to  
82 confirm whether the family was truly a monophyletic clade of parasitic red algae  
83 (Zuccarello et al. 2004). This study supported previous morphological observations  
84 (Fredericq and Hommersand 1990) confirming that the genus *Holmsella* was a member  
85 of the Gracilariaceae and questioned the legitimacy of recognizing a family of red algal  
86 parasites.

87           In the few other cases where molecular tools have been applied to assess  
88 evolutionary histories of red algal parasites, data suggests that red algal parasites arise

89 though independent evolutionary events (Goff et al. 1996, 1997, Kurihara et al. 2010). In  
90 addition to phylogenetic analyses, molecular tools have also been applied to investigate  
91 the parasite-host dynamics throughout parasite development. Analyses of the  
92 adelphoparasites *Gardneriella tuberifera* Kylin, *Gracilariophila oryzoides* Setchell & H.  
93 L. Wilson demonstrated that, although the parasites maintain a native mitochondrion,  
94 they have lost their native plastid and instead ‘hijack’ a host plastid when packaging their  
95 own spores (Goff and Coleman 1995). To date, all red algal parasites examined maintain  
96 a fully functional mitochondrion (Salomaki and Lane 2016). All adelphoparasites that  
97 have been investigated have lost their native plastid (Goff and Coleman 1995; Salomaki  
98 and Lane 2014; Salomaki and Lane unpublished). In contrast, a highly reduced native  
99 plastid was sequenced from the allopasite *Choreocolax polysiphoniae* Reinsch, which  
100 has lost genes involved in photosynthesis, yet maintains functions including fatty acid  
101 and amino acid biosynthesis (Salomaki et al. 2015). The lack of plastids in  
102 adelphoparasites, in combination with finding a native plastid in the allopasite *C.*  
103 *polysiphoniae*, demonstrates that not all parasites pass through an adelphoparasite stage  
104 and that there are multiple paths to parasitism in red algae.

105 In their study examining relationships in the Choreocolacaceae, Zuccarello *et al.*  
106 (2004) found that *Holmsella pachyderma* and *Holmsella australis* form a monophyletic  
107 clade within the Gracilariaceae. Additionally they identify that parasite genera  
108 *Choreocolax*, *Harveyella*, and *Leachiella* are members of the Rhodomelaceae, though  
109 have fairly low support for their relationships to each other. Using molecular data we  
110 investigate the relationships of *Choreocolax*, *Harveyella*, and *Leachiella*, and test the  
111 hypothesis that allopasites can arise and subsequently speciate, forming monophyletic

112 clades that infect a range of hosts. Furthermore, we set out to determine if another  
113 alloparasite besides *C. polysiphoniae* retains its own native plastid.

114

## 115 **MATERIALS AND METHODS**

### 116 *Sample Collection and DNA Extraction*

117 *Choreocolax polysiphoniae*, found on its host, *Vertebrata lanosa* (Linneaus) T.A.  
118 Christensen, was collected at Beavertail State Park, Jamestown, RI, USA. *Harveyella*  
119 *mirabilis* (Reinsch) F.Schmitz & Reinke, on its host, *Odonthalia washingtoniensis* Kylin,  
120 was collected from Cattle Point, Friday Harbor, WA, USA (48.452428, -122.962774),  
121 and *Leachiella pacifica* Kugrens, on *Polysiphonia hendryi* N.L. Gardner, was collected  
122 off the dock at Friday Harbor Laboratories, Friday Harbor WA, USA (48.545066, -  
123 123.012268). Individual parasite galls from *Harveyella mirabilis* and *Leachiella pacifica*  
124 were excised from their respective hosts and collected in a 1.5 mL microcentrifuge tube.  
125 The parasite tissue was hand-ground using a Corning Axygen® PES-15-B-SI disposable  
126 tissue grinder pestle in a 1.5 mL microcentrifuge tube while submerged in 100µL of  
127 DNA extraction buffer (Saunders 1993). DNA was extracted from specimens using a  
128 standard phenol/chloroform extraction with all ratios adjusted for an initial buffer volume  
129 of 100µL (Saunders 1993). Additionally, lyophilized DNA from specimen GWS021225  
130 (Saunders 2014) was acquired from the Saunders lab and rehydrated in 20µL of 5mM  
131 Tris/HCl pH 8.5.

132

### 133 *Molecular analyses*

134 A 664 bp fragment at the 5-prime end of the mitochondrial cytochrome oxidase 1  
135 gene (COI-5P), which has been used extensively for barcoding red algal species  
136 (Saunders 2005), was PCR amplified using the GWSFn (Le Gall and Saunders 2010) and  
137 GWSRx (Saunders and Moore 2013) primer pair according to protocols in Saunders and  
138 Moore (2013). All PCR reactions were completed with Ex Taq<sup>TM</sup> DNA Polymerase  
139 (Takara Bio USA, Mountainview, CA, USA) following the manufacturer's  
140 recommendations. The BigDye Terminator v3.1 Cycle Sequencing Kit (PE Applied  
141 Biosystems [ABI], Foster City, CA, USA) was used for the sequencing of PCR products,  
142 and reactions were analyzed using an ABI Prism 3130XL genetic analyzer. Sequences  
143 were trimmed and assembled using Geneious v. 9.1.5. The consensus sequences resulting  
144 from the assembly were BLAST searched against the NCBI GenBank database and the  
145 Barcode Of Life Database (boldsystems.org) to find similar publicly available sequences.

146 In addition to PCR amplification of the COI-5P, genomic DNA was amplified  
147 from all specimens using the illustra Single Cell GenomiPhi DNA Amplification kit (GE  
148 Healthcare Life Sciences, Pittsburgh, Pa) according to manufacturer protocols. Whole-  
149 genome amplification of an individual *C. polysiphoniae* parasite was completed using the  
150 illustra GenomiPhi Hy DNA Amplification Kit according to manufacturer protocols. The  
151 COI-5P was PCR amplified and sequenced, as previously described, from the whole-  
152 genome amplified DNA to screen for contamination resulting from the amplification  
153 process. Libraries for Illumina sequencing were constructed from the amplified DNA on  
154 the Apollo 324 robot using the PrepX ILM DNA Library Kit (Wafergen Biosystems,  
155 Fremont, CA, USA). The *Harveyella mirabilis*, *Leachiella pacifica*, and GWS021225  
156 libraries were multiplexed and sequenced on an Illumina MiSeq paired-end 250 x 250

157 basepair run. The *C. polysiphoniae* library was sequenced on separate full-cell Illumina  
158 MiSeq paired-end 300 x 300 basepair run. The sequencing effort resulted in 29,355,470  
159 paired-end reads for *C. polysiphoniae*, 7,923,094 paired end reads for *Harveyella*  
160 *mirabilis*, 7,502,360 paired-end reads for *Leachiella pacifica*, and 8,869,740 paired end  
161 reads for GWS021225. For all datasets, sequences with PHRED scores <30 were  
162 removed and the remaining reads were trimmed of adapter sequences. Additionally,  
163 fifteen 5' and five 3' nucleotides were trimmed from the remaining reads and all reads  
164 under 100 nucleotides were removed from the dataset. All trimming was completed using  
165 CLC Genomics Workbench v. 9.5.2 (CLC Bio-Qiagen, Aarhus, Denmark) and the  
166 remaining reads were assembled using default parameters in CLC Genomics Workbench  
167 v. 9.5.2.

168

### 169 *Phylogenetic Analysis*

170 A total of 823 Rhodomelaceae COI-5P sequences available on GenBank were  
171 downloaded into Geneious v. 9.1.5 {FormattingCitation} and aligned with the data  
172 generate by PCR for *Harveyella mirabilis* and *Leachiella pacifica*. This alignment was  
173 subjected to maximum likelihood analysis using RAxML with the GTR+I+G model with  
174 1,000 bootstrap replicates. Based upon the results of the preliminary tree, 18S, 28S, COI-  
175 5P, and *rbcL* data were compiled from GenBank for thirteen of the closest relatives to a  
176 weakly supported clade containing *Choreocolax polysiphoniae* Reinsch, *Harveyella*  
177 *mirabilis*, *Leachiella pacifica*, and GWS021225 (Table 1). The longest sequence for each  
178 gene from this compiled dataset was used as a query against local BLAST databases  
179 created from the *C. polysiphoniae*, *H. mirabilis*, *L. pacifica*, and GWS021225 assemblies,



180 (Table 1). The 18S and 28S regions were extracted from the ribosomal cistrons identified  
181 in each assembly based upon its alignment to the query gene.

182 Each dataset was aligned using the MAFFT plugin in Geneious v. 9.1.5 and  
183 subsequently concatenated using Sequence Matrix v. 1.7.8 {FormattingCitation}. The  
184 concatenated dataset was then subjected to phylogenetic analysis using maximum  
185 likelihood, implemented in RAxML v. 8.2.2 {FormattingCitation} and Bayesian  
186 Inference using MrBayes v. 3.2.2 {FormattingCitation}. For the maximum likelihood  
187 analysis the GTR+I+G model was used and bootstrap support values were calculated  
188 using 1,000 bootstrap replicates. For the Bayesian inference analysis, two Metropolis-  
189 coupled Markov chain Monte Carlo (MCMCMC) runs consisting of one cold chain and  
190 three hot chains were performed. Each run was sampled every 100 generations for  
191 1,010,000 generations. After confirming the runs converged by checking to ensure that  
192 the average standard deviation of split frequencies was below 0.01, the trees were  
193 merged. The resulting tree and posterior probabilities were calculated from the 20,202  
194 trees generated.

195

#### 196 *Plastid Genome Annotation*

197 A 90,654 bp contig was identified as the plastid genome of *Harveyella mirabilis*  
198 from the previously described assembled Illumina MiSeq data. Open reading frame  
199 (ORF) prediction on the *H. mirabilis* plastid was done in Geneious Pro v6.1 and the  
200 resulting ORFs were manually annotated using GenBank and Pfam (Finn et al. 2010,  
201 2015) databases. Functional annotations were assigned from the UniProt (The UniProt  
202 Consortium 2017) and KEGG databases (Kanehisa et al. 2016). Genes found in red algal

203 plastid genomes that were missing from the *H. mirabilis* plastid were searched for using  
204 BLAST, against the plastid sequence and the genomic assemblies to verify their absence  
205 and check for evidence of transfer to another genetic compartment. The plastid genome  
206 sequence was submitted to the tRNAscan-SE online server v1.21 (Schattner et al. 2005)  
207 for identification of tRNA sequences and to MFannot  
208 (<http://megasun.bch.umontreal.ca/cgi-bin/mfannot/mfannotInterface.pl>) to identify rRNA  
209 sequences and confirm manual gene annotations.

210

### 211 *Plastid Genome Comparative Analysis*

212 The circular plastid genomes of the free-living florideophytes, *Calliarthron*  
213 *tuberculosum* (KC153978), *Ceramium cimbricum* (KR025491), *Ceramium japonicum*  
214 (KX284719), *Chondrus crispus* (HF562234), *Dasya binghamiae* (KX247284), *Laurencia*  
215 *sp.* JFC0032 (LN833431), *Grateloupia taiwanensis* (KC894740), *Gracilaria*  
216 *tenuistipitata* (AY673996), *Vertebrata lanosa* (KP308097), and the alloparasites  
217 *Choreocolax polysiphoniae* (KP308096) and *Harveyella mirabilis* (XXXXXXXXXX) were  
218 arranged so their sequences began with the *ftsH* gene. Whole genome alignment was  
219 completed using the default settings for the progressiveMauve algorithm in the Mauve  
220 v2.3.1 (Darling et al. 2004).

221

222

## 223 **RESULTS**

### 224 *Identification of a Cryptic Parasite*

225           A maximum likelihood phylogenetic analysis of 823 Rhodomelaceae COI-5P  
226 sequences was completed using RAxML. This analysis provided weak support (bootstrap  
227 support of 23) for a clade containing the alloparasites *Choreocolax polysiphoniae*,  
228 *Harveyella mirabilis*, *Leachiella pacifica*, as well as 2 sequences labeled *Rhodomela*  
229 sp1Cal voucher GWS021225 (KM254767) and *Rhodomela* sp1Cal voucher GWS021347  
230 (KM254267) (Supplemental Figure 1). Interestingly, these two GenBank sequences had  
231 bootstrap support of 100 as being sister to the sequence of *Leachiella pacifica* generated  
232 in this study (data not shown). Based upon these results, the specimens were reexamined  
233 and parasite galls were found on the host, which was subsequently identified as  
234 *Polysiphonia paniculata* based upon *rbcL* sequence data.

235

#### 236 *Monophyletic Alloparasite Clade*

237           Although identification of parasites on the samples GWS021225 and  
238 GWS021347 was a direct result of resolving a clade of parasite sequences, bootstrap  
239 support for a monophyletic clade of alloparasites was weak and a subsequent Bayesian  
240 phylogeny failed to recover the same clade (data not shown). Based upon this original  
241 analysis, COI-5P data from a reduced dataset of the parasites and 28 of their closest  
242 relatives was subjected to maximum likelihood analysis, which again recovered a poorly  
243 supported monophyletic alloparasite clade (Supplemental Figure 2). To resolve the issue  
244 of low statistical support, thirteen taxa that were continually allied to the alloparasite  
245 clade were selected based upon availability of published comparative data. Phylogenetic  
246 analysis was conducted on a concatenated dataset comprised of 18S, 28S, COI-5P and  
247 *rbcL* (Table 1) from the 13 free-living species, and the alloparasites *C. polysiphoniae*, *H.*

248 *mirabilis*, *L. pacifica*, and the parasite on GWS021225 (from here on called *Leachiella*  
249 sp.). With the additional data beyond the COI-5P, both maximum likelihood and  
250 Bayesian inference recovered a monophyletic clade of red algal alloparasites with 75%  
251 bootstrap support and 0.99 posterior probability (Figure 1). *Choreocolax polysiphoniae*  
252 was the earliest branching parasite followed by *Harveyella mirabilis*, with *Leachiella*  
253 *pacifica* and *Leachiella* sp. being recovered as sister taxa with 100% bootstrap  
254 support/1.0 posterior probability (Figure 1).

255 To exclude long-branch attraction as a contributor to the monophyly of the clade  
256 of alloparasites, maximum likelihood analyses were conducted individually on the 18S  
257 and 28S gene trees, as well as the concatenated dataset with both species of *Leachiella*  
258 (the longest branches) removed. All analyses recovered a monophyletic clade of  
259 alloparasites, however the branching patterns differed between them. In the 18S gene  
260 tree, the clade had 82% bootstrap support, however *H. mirabilis* was the earliest  
261 branching parasite followed by *L. pacifica*, *L. sp.*, and *C. polysiphoniae*. The 28S gene  
262 tree recovered a monophyletic parasite clade with the same branching pattern observed in  
263 Figure 1, but with only 65% bootstrap support. The concatenated analysis with the two  
264 species of *Leachiella* removed also recovered *C. polysiphoniae* and *H. mirabilis* as sister  
265 species with 70% bootstrap support.

266

### 267 *Taxonomic Considerations*

268 *Choreocolax polysiphoniae* was initially described by Reinsch (1875) from the  
269 Atlantic coast of North America as parasitic on *Polysiphonia fastigiata* (now *Vertebrata*  
270 *lanosa*). Specimens used the phylogenetic analysis presented here (Figure 1) were

271 collected at Beavertail State Park in Jamestown, RI, USA infecting *Vertebrata lanosa* and  
272 are a strong match to the type description (Reinsch 1875). As the type collection cannot  
273 be located, we formally lectotypify *C. polysiphoniae* on image #49 accompanying the  
274 description in Reinsch (1875). Based upon the molecular analyses here, which resolved a  
275 monophyletic clade of parasitic red algae within the Rhodomelaceae (Figure 1), we  
276 formally transfer *Choreocolax* to the Rhodomelaceae and recognize Choreocolacaceae as  
277 a synonym of this family. To adhere to the principle of monophyly, the genus *Harveyella*,  
278 based on the type and only species *H. mirabilis* and included in our analyses (Figure 1), is  
279 also transferred to the Rhodomelaceae.

280

#### 281 *Harveyella mirabilis* Plastid Genome

282 The plastid genome of *Harveyella mirabilis* was assembled as a 90,654 kb  
283 circular molecule with 322x coverage. The plastid genome has an overall AT content of  
284 76.5% and contains 84 protein coding genes, 3 rRNAs, and 23 tRNAs (Figure 2). Similar  
285 to the *Choreocolax polysiphoniae* plastid (Salomaki et al. 2015), all genes related to  
286 photosynthesis have been lost with the exception of *petF* which has been demonstrated to  
287 be involved in electron transport in other metabolic pathways (Happe and Naber 1993,  
288 Jacobs et al. 2009). Genes involved in transcription/translation and fatty acid, amino acid,  
289 protein, isoprene biosynthesis remain conserved. As in the *C. polysiphoniae* plastid, *glbB*  
290 appears to be a vanishing pseudogene. BLAST similarity searches are able to find  
291 conserved homology, however the presence of stop-codons throughout the region  
292 suggests that the gene is likely no longer capable of being completely translated.

293

## 294 *Plastid Genome Comparisons*

295 A whole genome MAUVE alignment of the *H. mirabilis* with *C. polysiphoniae* and nine  
296 representative free-living Florideophyceae plastid genomes identified 13 locally collinear  
297 blocks in the *H. mirabilis* genome that aligned with the free-living plastids (Figure 3).  
298 There were no rearrangements or inversions in the *H. mirabilis* plastid genome when  
299 compared to photosynthetic Rhodomelaceae taxa. When aligning *H. mirabilis* to the *C.*  
300 *polysiphoniae* plastid genome, 11 locally collinear blocks are identified, and several  
301 genome inversions and rearrangements are evident (Figure 4). Additionally, gene content  
302 varies slightly between the two parasite plastid genomes. *Harveyella mirabilis* retains  
303 *argB*, *carA*, *infB*, *rnz*, *rpl9*, *rpl17*, *rpl24*, *rpl32*, *rpl33*, *rpl34*, *rpoZ*, *rps18*, *rps20*, *ycf21*,  
304 which have all been lost in *C. polysiphoniae* (Table 2), while *C. polysiphoniae* maintains  
305 copies of *dnaB* and *fabH* which have both been lost in the *H. mirabilis* plastid genome.

306

## 307 **DISCUSSION**

### 308 *Origin of Parasites*

309 With 121 described parasites occurring across eight Florideophyceae orders  
310 (Salomaki and Lane 2014, Blouin and Lane 2015, Preuss et al. 2017), red algae appear  
311 more able to transition from autotrophy to parasitic lifestyles than any other eukaryotic  
312 lineage. The terms adelphoparasite and alloparasite have traditionally been used to  
313 describe parasites that infect hosts within their tribe/family, or in different tribes/families,  
314 respectively. The use of these terms has been questioned as molecular data have revealed  
315 that alloparasites, like adelphoparasites, infect close relatives rather than distantly related  
316 species (Zuccarello et al. 2004, Kurihara et al. 2010). Phylogenetic analysis using data

317 presented here place *Choreocolax polysiphoniae*, *Harveyella mirabilis*, and two species  
318 of *Leachiella* firmly within the same family as their hosts further supporting  
319 abandonment of these terms for differentiating two types of red algal parasites.

320

### 321 *The Demise of Exclusively Parasitic Families*

322 Sturch (1926) initially described the Choreocolacaceae as a family of  
323 holoparasites, containing the genera *Choreocolax*, *Harveyella*, and *Holmsella*. However,  
324 more recent morphological investigation considered that the genus *Holmsella* was related  
325 to the parasites *Gelidiocolax* and *Pterocladiphila*, and it was moved to the family  
326 Pterocladiphilaceae in the Gracilariales (Fredericq and Hommersand 1990). Their  
327 observations were subsequently supported by molecular data generated with the specific  
328 aim of testing the phylogenetic affinities of parasites that Sturch had assigned to the  
329 Choreocolacaceae. This work demonstrated that *Holmsella australis* and *Holmsella*  
330 *pachyderma* formed a well supported monophyletic clade within the Gracilariaceae  
331 (Zuccarello et al. 2004). Their molecular data also indicated that *Choreocolax* and  
332 *Harveyella* belong in the Ceramiales, leading the authors to question whether the  
333 Choreocolacaceae should continue to be recognized (Zuccarello et al. 2004). However,  
334 their use of 18S sequence data was insufficient to resolve the issue of a monophyletic  
335 clade for these parasites. Other authors have also noted that species in *Choreocolax*,  
336 *Harveyella*, and *Leachiella* have features aligning them to the Ceramiales, but again,  
337 taxonomic affinities among the parasite species and within this order remained uncertain  
338 (Goff and Cole 1975, Kugrens 1982, Fredericq and Hommersand 1990). Our data  
339 confirm the findings of Zuccarello, Moon, and Goff (2004), placing *Choreocolax*,

340 *Harveyella* and *Leachiella*, within the Rhodomelaceae. Furthermore, the phylogeny  
341 utilizing additional molecular markers provides strong support for a monophyletic clade  
342 containing *Choreocolax*, *Harveyella* and *Leachiella* (Figure 1), and supports the placing  
343 the Choreocolacaceae in synonymy with the Rhodomelaceae.

344

#### 345 *Cryptic Species*

346       Until recently, the dogma behind red algal parasite evolution was the notion that  
347 parasites arise sympatrically as adelphoparasites and over time evolve and adapt to infect  
348 more distant hosts becoming alloparasites (Goff et al. 1996, 1997). Based on molecular  
349 data demonstrating that alloparasites also infect members of their own family (Zuccarello  
350 et al. 2004, Kurihara et al. 2010), we now consider that these terms are not suitable for  
351 distinguishing parasites. The recognition of multiple monophyletic parasite clades, the  
352 *Holmsella* clade (Zuccarello et al. 2004), and the Rhodomelaceae clade uncovered here  
353 containing *Choreocolax*, *Harveyella*, and *Leachiella* (Figure 1), supports the idea of a  
354 sympatric origin of alloparasites with subsequent speciation as parasites adapt to their  
355 hosts, without passing through an adelphoparasite-like stage.

356

357       Previously, *Leachiella pacifica* was described from multiple hosts including  
358 members of the genus *Polysiphonia* and *Pterosiphonia* (Kugrens 1982, Zuccarello and  
359 West 1994). In their study on *L. pacifica* host specificity, Zuccarello and West (1994)  
360 found that parasite spores isolated from one host genus were unable to infect members of  
361 the other host genus. Kugrens initially designated the *Leachiella pacifica* type specimen  
362 as a parasite infecting *Polysiphonia* spp. from Cattle Point, Friday Harbor, WA, USA



363 (Kugrens 1982). Based upon this, here we are considering the specimen collected on  
364 *Polysiphonia hendryi* from Friday Harbor, WA, USA as true *Leachiella pacifica*.  
365 Subsequently, parasites infecting *Polysiphonia paniculata* (and several other species)  
366 have also been attributed to *L. pacifica* (Zuccarello and West 1994, Zuccarello et al.  
367 2004). Molecular data here identify two distinct species of *Leachiella* that infect separate  
368 hosts but are otherwise difficult to distinguish. Due to the highly reduced morphology of  
369 these parasites, it seems likely that host identity may be the easiest way to identify  
370 parasites in the genus *Leachiella* to species.

371         Some parasitic red algae are reportedly capable of infecting a range of hosts [e.g.,  
372 *Asterocolax* – see Goff, Ashen, and Moon (1997)], however molecular data are  
373 contradicting that notion. Rather, it appears that red algal parasite species have higher  
374 host specificity than previously believed, and instead, we have underestimated the  
375 amount of parasite diversity as a result of their reduced morphology. Morphology based  
376 studies report *Leachiella pacifica* infecting at least seven unique host species (Zuccarello  
377 and West 1994), further molecular analyses will surely uncover additional species in the  
378 genus *Leachiella*.

379

### 380 *Parasite Plastids*

381         The link between plastid origin in red algal parasites and their evolutionary  
382 relationship to their hosts may be central to our understanding of red algal parasite  
383 evolution. The *Harveyella mirabilis* plastid genome (Figure 2) represents the second red  
384 algal parasite demonstrated to retain a reduced native plastid. Similar to *Choreocolax*  
385 *polysiphoniae*, the *H. mirabilis* plastid genome remains conserved for functions including

386 amino acid, fatty acid, and protein biosynthesis, but has lost genes involved in building  
387 the light harvesting apparatus, photosystems I and II, and other photosynthesis related  
388 genes. Identifying a monophyletic clade of parasites (Figure 1) in which the two earliest  
389 branching members identified so far retain plastids, strongly suggests that plastids are  
390 also retained in species of *Leachiella*. Preliminary data generated in the Lane lab supports  
391 that hypothesis, though work remains to completely sequence plastids from *Leachiella*  
392 species.

393         The *H. mirabilis* plastid gene order, with the exception of the missing  
394 photosynthesis genes, is conserved when compared to plastids of free-living  
395 Rhodomelaceae species (Figure 3). In contrast, we find that the *C. polysiphoniae* plastid  
396 has undergone greater gene loss than the *H. mirabilis* plastid, and a substantial amount of  
397 genome reorganization (Figure 4). *Harveyella mirabilis* retains 13 genes that have been  
398 lost from the *C. polysiphoniae* plastid (Table 2); *argB* and *carA*, which are involved in  
399 arginine biosynthesis processes, *rpoZ*, which promotes RNA polymerase assembly, nine  
400 ribosomal protein genes, and an uncharacterized hypothetical protein. In contrast, *C.*  
401 *polysiphoniae* retains copies of *dnaB*, which is involved in DNA replication, and *fabH*,  
402 which is involved in fatty acid biosynthesis, both of which have been lost in *H. mirabilis*.  
403 Analysis of additional plastid genomes in this clade will provide greater insights into  
404 patterns of plastid genome evolution in red algal parasites.

405         Two hypotheses have been proposed for the origin of red algal parasites. Setchell  
406 (1918) suggested that a mutation in a spore causes parasites to arise sympatrically, while  
407 Sturch (1926) postulated that parasitic red algae start out as epiphytes that over time  
408 become endophytes and increasingly rely on the host for nutrition. It seems plausible that

409 Setchell's origin hypothesis could explain the rise of the so-called adelphoparasites,  
410 which comprise the majority of known red algal parasite biodiversity. By evolving from  
411 their hosts, adelphoparasites could more easily incorporate a copy of a genetically similar  
412 plastid as their own. Replacing a functionally reduced or non-functional native plastid  
413 with a host-derived plastid seems to be an easy mechanism for survival. Unfortunately,  
414 reliance on the host plastid also starts the newly evolved parasite down a path towards  
415 inevitable extinction. In order for a non-photosynthetic parasite to survive it still must  
416 retain compatibility for other plastid functions including amino acid and fatty acid  
417 biosynthesis. Because the host-derived plastid is newly acquired during each new  
418 infection, the host plastid experiences one set of evolutionary pressures while the parasite  
419 evolves and accumulates mutations of its own. Eventually the parasite will inevitably lose  
420 the ability to communicate with the host plastid as the parasite and host increasingly  
421 become genetically distinct. This leaves the parasite with two possibilities for survival,  
422 either to find another host with a compatible plastid or go extinct. Alternatively, the  
423 success of an alloparasite may be explained by Sturch's hypothesis. By evolving from a  
424 closely related epiphyte that is able to create secondary pit connections, the parasite may  
425 retain its own plastid and therefore enable its longevity and the opportunity to even  
426 speciate as the parasite adapts to new hosts. Therefore, what were previously viewed as  
427 competing hypotheses to explain the evolution of red algal parasites, may each explain  
428 how different types of parasites arise.

429         Although organisms have transitioned from photosynthesis to other methods of  
430 nutrient acquisition numerous times across the tree of life, support for total plastid loss is  
431 rare (Gornik et al. 2015) with most cases resulting in highly reduced plastids retained for

432 core functions (e.g. isoprenoid and fatty acid biosynthesis) (Wolfe et al. 1992, Knauf and  
433 Hachtel 2002, de Koning and Keeling 2006) or in extreme cases the retention of the  
434 apicoplast in Apicomplexans . The non-photosynthetic red algal parasites traditionally  
435 considered adelphoparasites, including *Gracilariophila oryzoides* and *Gardneriella*  
436 *tuberifera*, still require a copy of the host plastid for functions that, to date, remain  
437 undetermined. Interestingly, in the *Gracilariophila oryzoides* genome and transcriptome,  
438 photosynthesis related nuclear-encoded plastid-targeted genes remain conserved while  
439 those same genes are absent from the *Choreocolax polysiphoniae* transcriptome  
440 (Salomaki and Lane, unpublished).

441 Data presented here further highlight the need to abandon the notion that  
442 taxonomy defines red algal parasites. By placing the family Choreocolacaceae in  
443 synonymy with the Rhodomelaceae we are making steps to remove the artificial  
444 appearance of parasites infecting hosts in different families. Furthermore, we recognize  
445 that a major distinction between types of red algal parasites is the origin of the parasite  
446 plastids. While some parasites, including *Harveyella mirabilis* and *Choreocolax*  
447 *polysiphoniae*, retain a native plastid that evolves in concert with the parasite, others  
448 including *Gracilariophila oryzoides* and *Gardneriella tuberifera*, incorporate a copy of a  
449 host plastid when packaging spores, but will inevitably evolve and become incompatible  
450 with the host plastid and blink out of existence. We predict that investigations of parasites  
451 that have traditionally referred to as alloparasites, like *Holmsella* and *Pterocladiphila*,  
452 will also provide evidence of plastid retention and monophyletic clades of parasites.

453

454 **ACKNOWLEDGEMENTS**

455 The authors thank Amanda Savoie for help identifying parasite sequence data in the UNB  
456 database, Jillian Freese for collecting specimens of *Harveyella mirabilis* and *Leachiella*  
457 *pacifica*, and Kristina Terpis for her support in the lab. Funding for this work was  
458 provided to by a Phycological Society of America Grant-in-Aid of Research to ES and by  
459 grant #1257472 from the National Science Foundation awarded to CL. This research is  
460 based in part upon work conducted using the Rhode Island Genomics and Sequencing  
461 Center which is supported in part by the National Science Foundation (MRI Grant No.  
462 DBI-0215393 and EPSCoR Grant Nos. 0554548 & EPS-1004057), the US Department of  
463 Agriculture (Grant Nos. 2002-34438-12688 and 2003-34438-13111), and the University  
464 of Rhode Island.

465

466 | **LITERATURE CITED**

- 467 Blouin, N. & Lane, C. 2015. Red algae provide fertile ground for exploring parasite  
468 evolution. *Perspect. Phycol.* 3:11–9.
- 469 Broadwater, S.T. & Lapointe, E.A. 1997. Parasitic interactions and vegetative  
470 ultrastructure of *Choreonema thuretii* (Corallinales, Rhodophyta). *J. Phycol.*  
471 33:396–407.
- 472 Darling, A.C.E., Mau, B., Blattner, F.R. & Perna, N.T. 2004. Mauve : Multiple alignment  
473 of conserved genomic sequence with rearrangements. *Genome Res.* 14:1394–403.
- 474 de Koning, A.P. & Keeling, P.J. 2006. The complete plastid genome sequence of the  
475 parasitic green alga *Helicosporidium* sp. is highly reduced and structured. *BMC Biol.*  
476 4.
- 477 Feldmann, G. & Feldmann, J. 1958. Recherches sur quelques Floridees parasites. *Rev.*

- 478 *Gen. Bot.* 65:49–128.
- 479 Finn, R.D., Coghill, P., Eberhardt, R.Y., Eddy, S.R., Mistry, J., Mitchell, A.L., Potter,  
480 S.C. et al. 2015. The Pfam protein families database: towards a more sustainable  
481 future. *Nucleic Acids Res.* 44:D279–85.
- 482 Finn, R.D., Mistry, J., Tate, J., Coghill, P., Heger, A., Pollington, J.E., Gavin, O.L. et al.  
483 2010. The Pfam protein families database. *Nucleic Acids Res.* 38:D211–22.
- 484 Goff, L.J. 1982. The biology of parasitic red algae. *Prog. Phycol. Res.* 1:289–369.
- 485 Goff, L.J., Ashen, J. & Moon, D. 1997. The evolution of parasites from their hosts: A  
486 case study in the parasitic red alga. *Evolution.* 51:1068–78.
- 487 Goff, L.J. & Cole, K. 1975. The biology of *Harveyella mirabilis* (Cryptonemiales,  
488 Rhodophyceae). II . Carposporophyte development as related to the taxonomic  
489 affiliation of the parasitic red alga, *Harveyella mirabilis*. *Phycologia.* 14:227–38.
- 490 Goff, L.J. & Coleman, A.W. 1985. The role of secondary pit connections in red algal  
491 parasitism. *J. Phycol.* 21:483–508.
- 492 Goff, L.J. & Coleman, A.W. 1995. Fate of parasite and host organelle DNA during  
493 cellular transformation of red algae by their parasites. *Plant Cell.* 7:1899–911.
- 494 Goff, L.J., Moon, D.A., Nyvall, P., Stache, B., Mangin, K. & Zuccarello, G. 1996. The  
495 evolution of parasitism in the red algae: Molecular comparisons of adelphoparasites  
496 and their hosts. *J. Phycol.* 32:297–312.
- 497 Gornik, S.G., Febrimarsa, Cassin, A.M., MacRae, J.I., Ramaprasad, A., Rchiad, Z.,  
498 McConville, M.J. et al. 2015. Endosymbiosis undone by stepwise elimination of the  
499 plastid in a parasitic dinoflagellate. *Proc. Natl. Acad. Sci.* 112:201423400.
- 500 Happe, T. & Naber, J.D. 1993. Isolation, characterization and N-terminal amino acid

501 sequence of hydrogenase from the green alga *Chlamydomonas reinhardtii*. *Eur. J.*  
502 *Biochem.* 214:475–81.

503 Jacobs, J., Pudollek, S., Hemschemeier, A. & Happe, T. 2009. A novel, anaerobically  
504 induced ferredoxin in *Chlamydomonas reinhardtii*. *FEBS Lett.* 583:325–9.

505 Kanehisa, M., Sato, Y., Kawashima, M., Furumichi, M. & Tanabe, M. 2016. KEGG as a  
506 reference resource for gene and protein annotation. *Nucleic Acids Res.* 44:D457–62.

507 Kears, M., Moir, R., Wilson, A., Stones-Havas, S., Cheung, M., Sturrock, S., Buxton, S.  
508 et al. 2012. Geneious Basic: an integrated and extendable desktop software platform  
509 for the organization and analysis of sequence data. *Bioinformatics.* 28:1647–9.

510 Knauf, U. & Hachtel, W. 2002. The genes encoding subunits of ATP synthase are  
511 conserved in the reduced plastid genome of the heterotrophic alga *Prototheca*  
512 *wickerhamii*. *Mol. Genet. Genomics.* 267:492–7.

513 Kugrens, P. 1982. *Leachiella pacifica*, Gen. et Sp. nov., a new parasitic red alga from  
514 Washington and California. *Am. J. Bot.* 123:306–19.

515 Kurihara, A., Abe, T., Tani, M. & Sherwood, A.R. 2010. Molecular phylogeny and  
516 evolution of red algal parasites: A case study of *Benzaitenia*, *Janczewskia*, and  
517 *Ululania* (Ceramiaceae). *J. Phycol.* 46:580–90.

518 Le Gall, L. & Saunders, G.W. 2010. DNA barcoding is a powerful tool to uncover algal  
519 diversity: A case study of the phylloporaceae (Gigartinales, Rhodophyta) in the  
520 Canadian flora. *J. Phycol.* 46:374–89.

521 Preuss, M., Nelson, W.A. & Zuccarello, G.C. 2017. Red algal parasites: a synopsis of  
522 described species, their hosts, distinguishing characters and areas for continued  
523 research. *Bot. Mar.* 60:1–13.

- 524 Reinsch, P.F. 1875. *Contributiones ad Algologiam et Fungologiam*. Lipsiae, Nuremberg.  
525 61 pp.
- 526 Ronquist, F., Teslenko, M., van der Mark, P., Ayres, D.L., Darling, A., Höhna, S., Larget,  
527 B. et al. 2012. MrBayes 3.2: efficient Bayesian phylogenetic inference and model  
528 choice across a large model space. *Syst. Biol.* 61:539–42.
- 529 Salomaki, E.D. & Lane, C.E. 2014. Are all red algal parasites cut from the same cloth?  
530 *Acta Soc. Bot. Pol.* 83:369–75.
- 531 Salomaki, E.D. & Lane, C.E. 2016. Red Algal Mitochondrial Genomes are More  
532 Complete than Previously Reported. *Genome Biol. Evol.* 48:evw267.
- 533 Salomaki, E.D., Nickles, K.R. & Lane, C.E. 2015. The ghost plastid of *Choroecolax*  
534 *polysiphoniae*. *J. Phycol.* 51:217–21.
- 535 Saunders, G.W. 1993. Gel purification of red algal genomic DNA: An inexpensive and  
536 rapid method for the isolation of polymerase chain reaction-friendly DNA. *J.*  
537 *Phycol.* 29:251–4.
- 538 Saunders, G.W. 2005. Applying DNA barcoding to red macroalgae: a preliminary  
539 appraisal holds promise for future applications. *Philos. Trans. R. Soc. Lond. B. Biol.*  
540 *Sci.* 360:1879–88.
- 541 Saunders, G.W. 2014. Long distance kelp rafting impacts seaweed biogeography in the  
542 Northeast Pacific: the kelp conveyor hypothesis. *J. Phycol.* 50:968–74.
- 543 Saunders, G.W. & Moore, T.E. 2013. Refinements for the amplification and sequencing  
544 of red algal DNA barcode and RedToL phylogenetic markers: a summary of current  
545 primers, profiles and strategies. *Algae.* 28:31–43.
- 546 Schattner, P., Brooks, A.N. & Lowe, T.M. 2005. The tRNAscan-SE, snoscan and



- 547 snoGPS web servers for the detection of tRNAs and snoRNAs. *Nucleic Acids Res.*  
548 33:686–9.
- 549 Setchell, W.A. 1914. Parasitic Florideae I. *Univ. Calif. Publ. Bot.* 6:1–34.
- 550 Setchell, W.A. 1918. Parasitism Among the Red Algae. *Proc. Am. Philisophical Soc.*  
551 57:155–72.
- 552 Setchell, W.A. 1923. Parasitic Florideae II. *Univ. Calif. Publ. Bot.* 10:393–401.
- 553 Stamatakis, A. 2014. RAxML version 8: A tool for phylogenetic analysis and post-  
554 analysis of large phylogenies. *Bioinformatics.* 30:1312–3.
- 555 Sturch, H.H. 1926. Choreocolax Polysiphoniae, Reinsch. *Ann. Bot.* XL.
- 556 The UniProt Consortium. 2017. UniProt: the Universal Protein knowledgebase. *Nucleic*  
557 *Acids Res.* 45:D158–69.
- 558 Vaidya, G., Lohman, D.J. & Meier, R. 2011. SequenceMatrix: Concatenation software  
559 for the fast assembly of multi-gene datasets with character set and codon  
560 information. *Cladistics.* 27:171–80.
- 561 Wetherbee, R. & Quirk, H. 1982. The Fine Structure and Cytology of the Association  
562 Between the Parasitic Red Alga *Holmsella australis* and Its Red Algal Host  
563 *Gracilaria furcellata*. *Protoplasma.* 165:153–65.
- 564 Wolfe, K.H., Morden, C.W. & Palmer, J.D. 1992. Function and evolution of a minimal  
565 plastid genome from a nonphotosynthetic parasitic plant. *Proc. Natl. Acad. Sci. U. S.*  
566 *A.* 89:10648–52.
- 567 Zuccarello, G.C., Moon, D. & Goff, L.J. 2004. A phylogenetic study of parasitic genera  
568 placed in the family Choreocolacaceae (Rhodophyta). *J. Phycol.* 40:937–45.

569 Zuccarello, G.C. & West, J.A. 1994. Genus and race specificity in the red algal parasite

570 *Leachiella pacifica* (Choreocolacaceae, Rhodophyta). *Phycologia*. 33:213–8.

571

572

573 Table 1. GenBank Sequence accession numbers for taxa used in phylogenetic analyses  
574 (Figure 2).  
575

|                                  | <b>18S</b> | <b>28S</b> | <b>COI-5P</b> | <b>rbcL</b> |
|----------------------------------|------------|------------|---------------|-------------|
| <i>Amansia fimbriifolia</i>      | HM582913   | HQ422079   | HM582889      | -           |
| <i>Amansia glomerata</i>         | HM582909   | HQ422225   | HQ422913      | -           |
| <i>Bostrychia arbuscula</i>      | -          | AY920894   | KM502795      | AY920845    |
| <i>Bostrychia intricata</i>      | -          | KM502850   | KM502801      | AY920846    |
| <i>Bostrychia vaga</i>           | -          | KM502842   | KM502791      | KM502817    |
| <i>Choreocolax polysiphoniae</i> | This Study | This Study | This Study    | -           |
| <i>Harveyella mirabilis</i>      | This Study | This Study | This Study    | -           |
| <i>Heterodasya mucronata</i>     | -          | -          | KC567673      | KF367797    |
| <i>Leachiella pacifica</i>       | This Study | This Study | This Study    | -           |
| <i>Leachiella</i> sp. GWS021225  | This Study | This Study | KM254767      | -           |
| <i>Neorhodomela larix</i>        | AY617140   | -          | KM254241      | GQ252553    |
| <i>Neorhodomela oregona</i>      | -          | -          | KM254304      | GQ252556    |
| <i>Odonthalia dentata</i>        | -          | JX572172   | JX571960      | KU564463    |
| <i>Odonthalia floccosa</i>       | AY617141   | -          | KM254276      | GQ252492    |
| <i>Osmundaria obtusiloba</i>     | -          | HQ422003   | HQ422818      | -           |
| <i>Rhodomela confervoides</i>    | AY617145   | KX145642   | KX258842      | KX146197    |
| <i>Rhodomela lycopodioides</i>   | -          | This Study | HM916516      | KU564489    |

576

577

578 Table 2. *Harveyella mirabilis* plastid genes and their function, which have been lost from  
579 the *Choreocolax polysiphoniae* plastid genome.  
580

| Gene Name    | Biological Process and Molecular Function                                                         |
|--------------|---------------------------------------------------------------------------------------------------|
| <i>argB</i>  | Amino acid biosynthesis; ATP binding, acetylglutamate kinase activity                             |
| <i>carA</i>  | Pyrimidine metabolism; ATP binding, carbamoyl-phosphate synthase (glutamine-hydrolyzing) activity |
| <i>infB</i>  | Translation; Translation initiation, GTP binding                                                  |
| <i>rpl9</i>  | Translation; structural constituent of the 50S ribosome                                           |
| <i>rpl17</i> | Translation; structural constituent of the 50S ribosome                                           |
| <i>rpl24</i> | Translation; structural constituent of the 50S ribosome                                           |
| <i>rpl32</i> | Translation; structural constituent of the 50S ribosome                                           |
| <i>rpl33</i> | Translation; structural constituent of the 50S ribosome                                           |
| <i>rpl34</i> | Translation; structural constituent of the 50S ribosome                                           |
| <i>rpoZ</i>  | Transcription; DNA binding                                                                        |
| <i>rps18</i> | Translation; structural constituent of the 30S ribosome                                           |
| <i>rps20</i> | Translation; structural constituent of the 30S ribosome                                           |
| <i>ycf21</i> | Uncharacterized hypothetical protein                                                              |

581

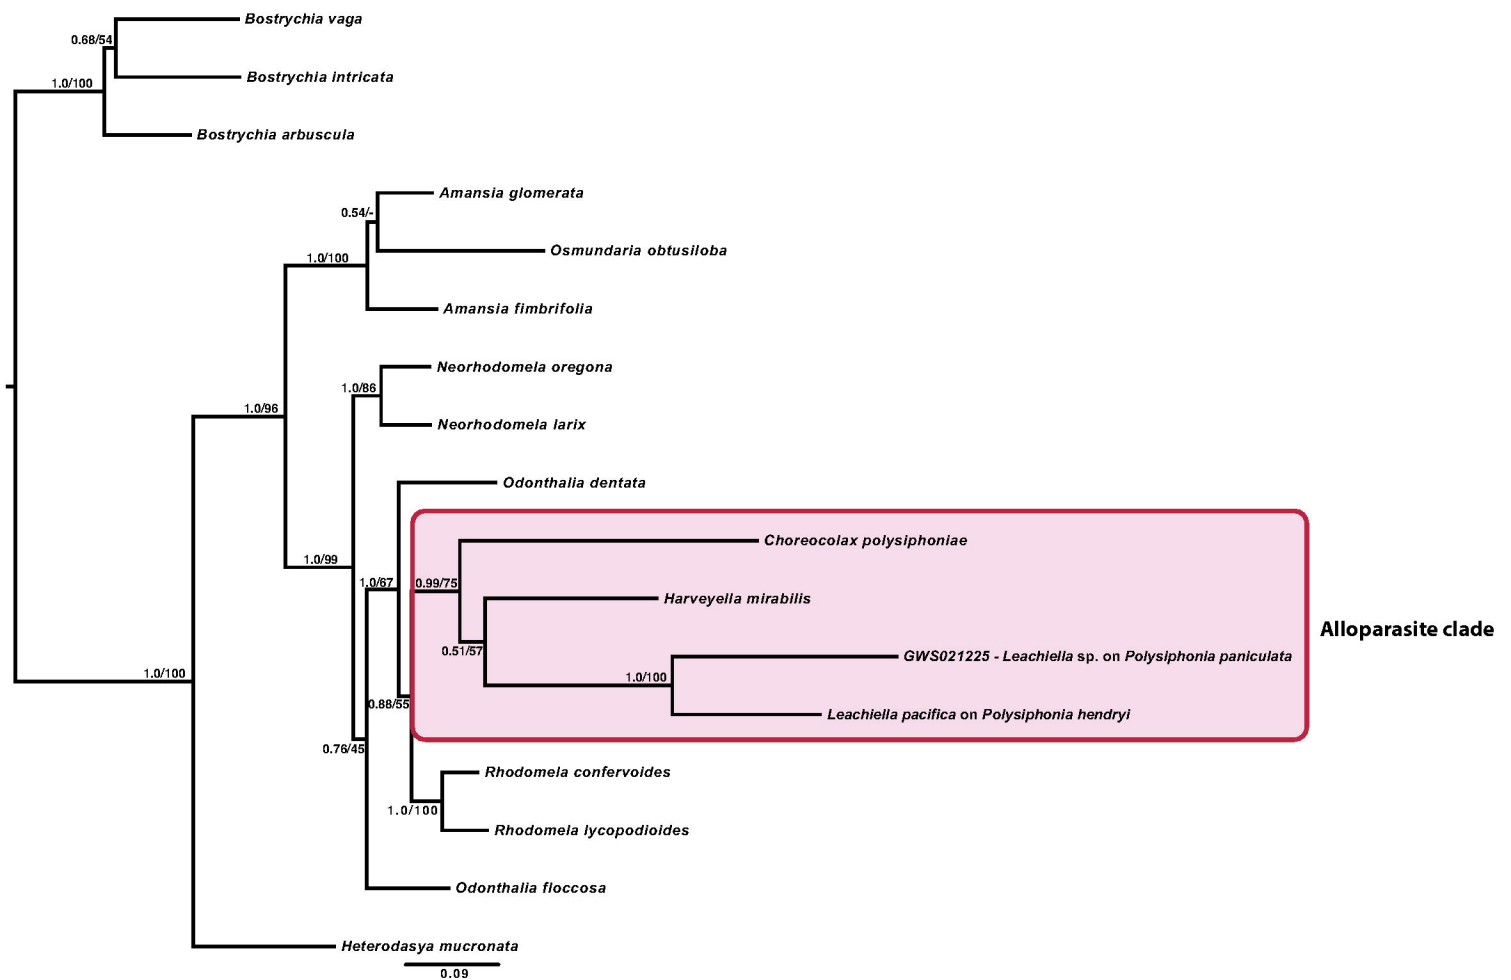

**Figure 1.** Maximum likelihood phylogeny based on concatenated 18S, 28S, COI-5P, and rbcL data as shown in Table 1, of the parasites *Choreocolax polysiphoniae*, *Harveyella mirabilis*, *Leachiella pacifica*, an undescribed species of *Leachiella* found on *Polysiphonia paniculata*, and thirteen close relatives. This phylogenetic analysis supports a monophyletic clade of parasites arising within the Rhodomelaceae. Support values shown as Bayesian posterior probability/maximum likelihood bootstrap.

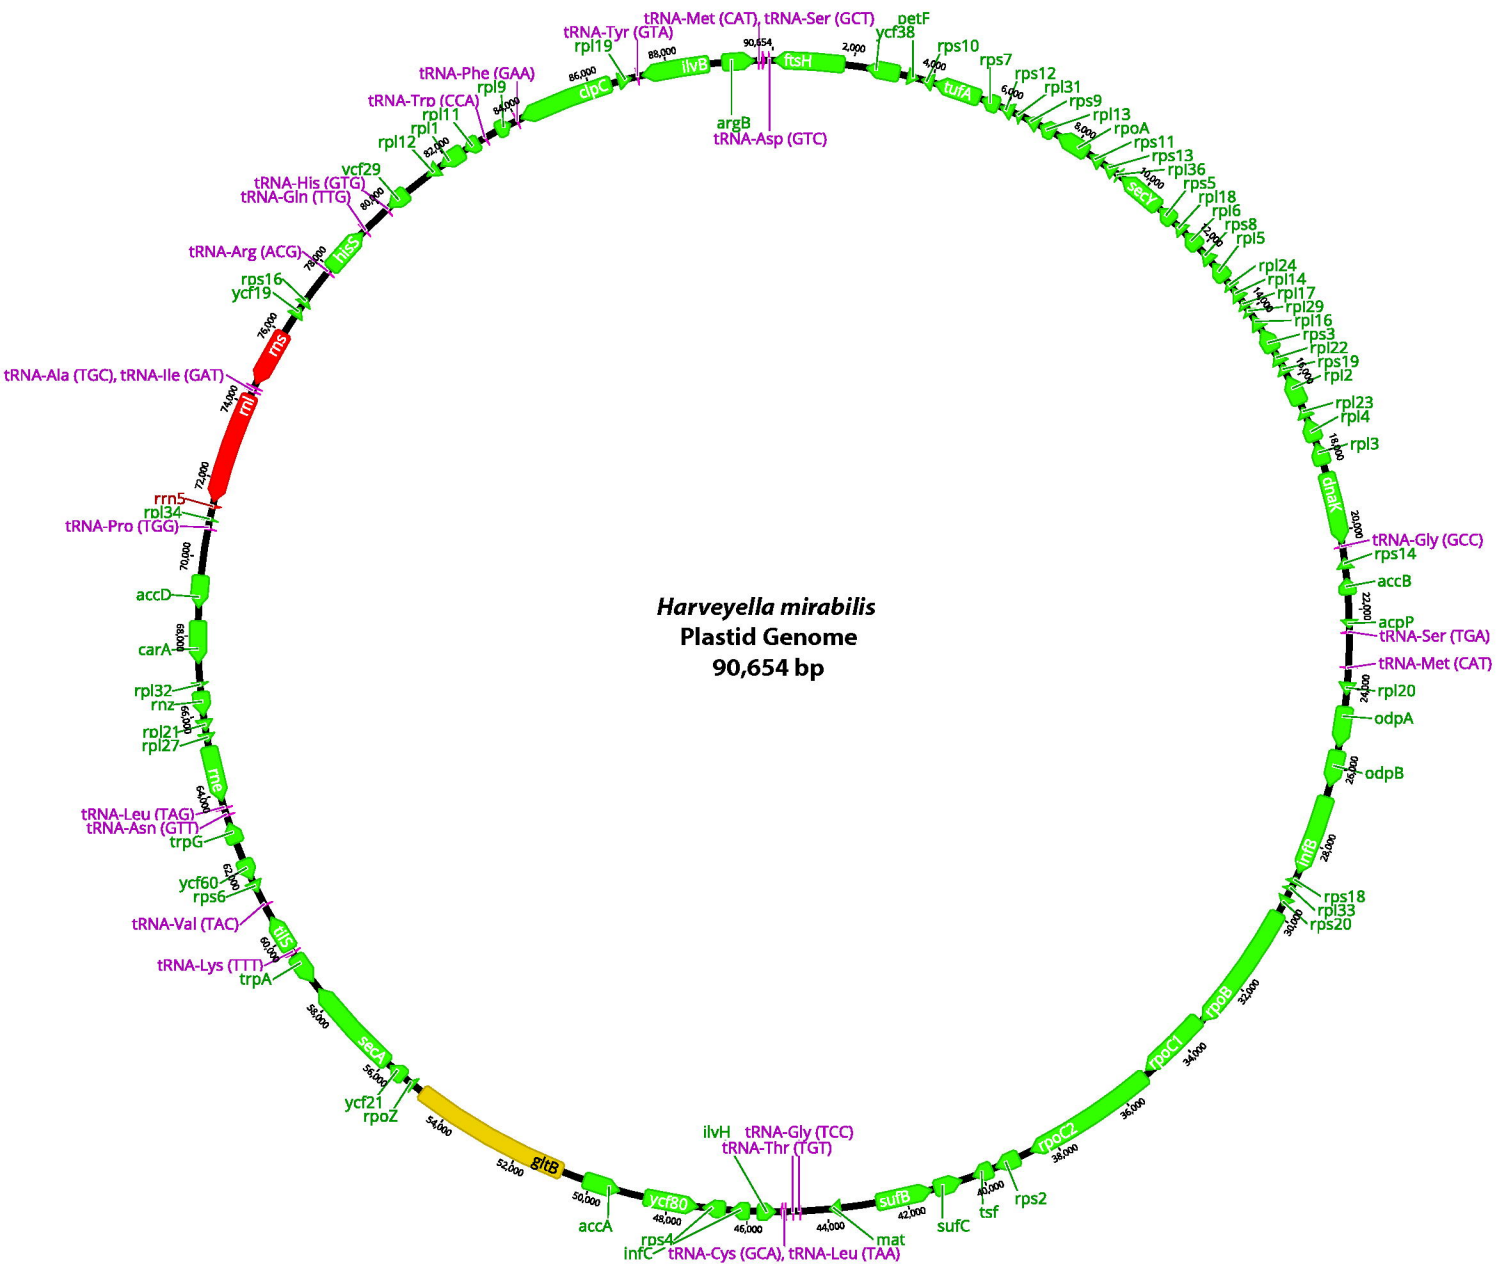

**Figure 2.** The plastid genome of the parasitic red alga, *Harveyella mirabilis* is 90,654 basepairs and contains 84 protein coding genes (Green), the 5S, 16S, and 23S rRNAs (Red), and 23 tRNAs (Pink). All genes involved with photosynthetic functions, except *petF*, have been lost. The *ftsH* gene is truncated but may still be transcribed, however *gltB* is a non-functional pseudogene (Yellow).

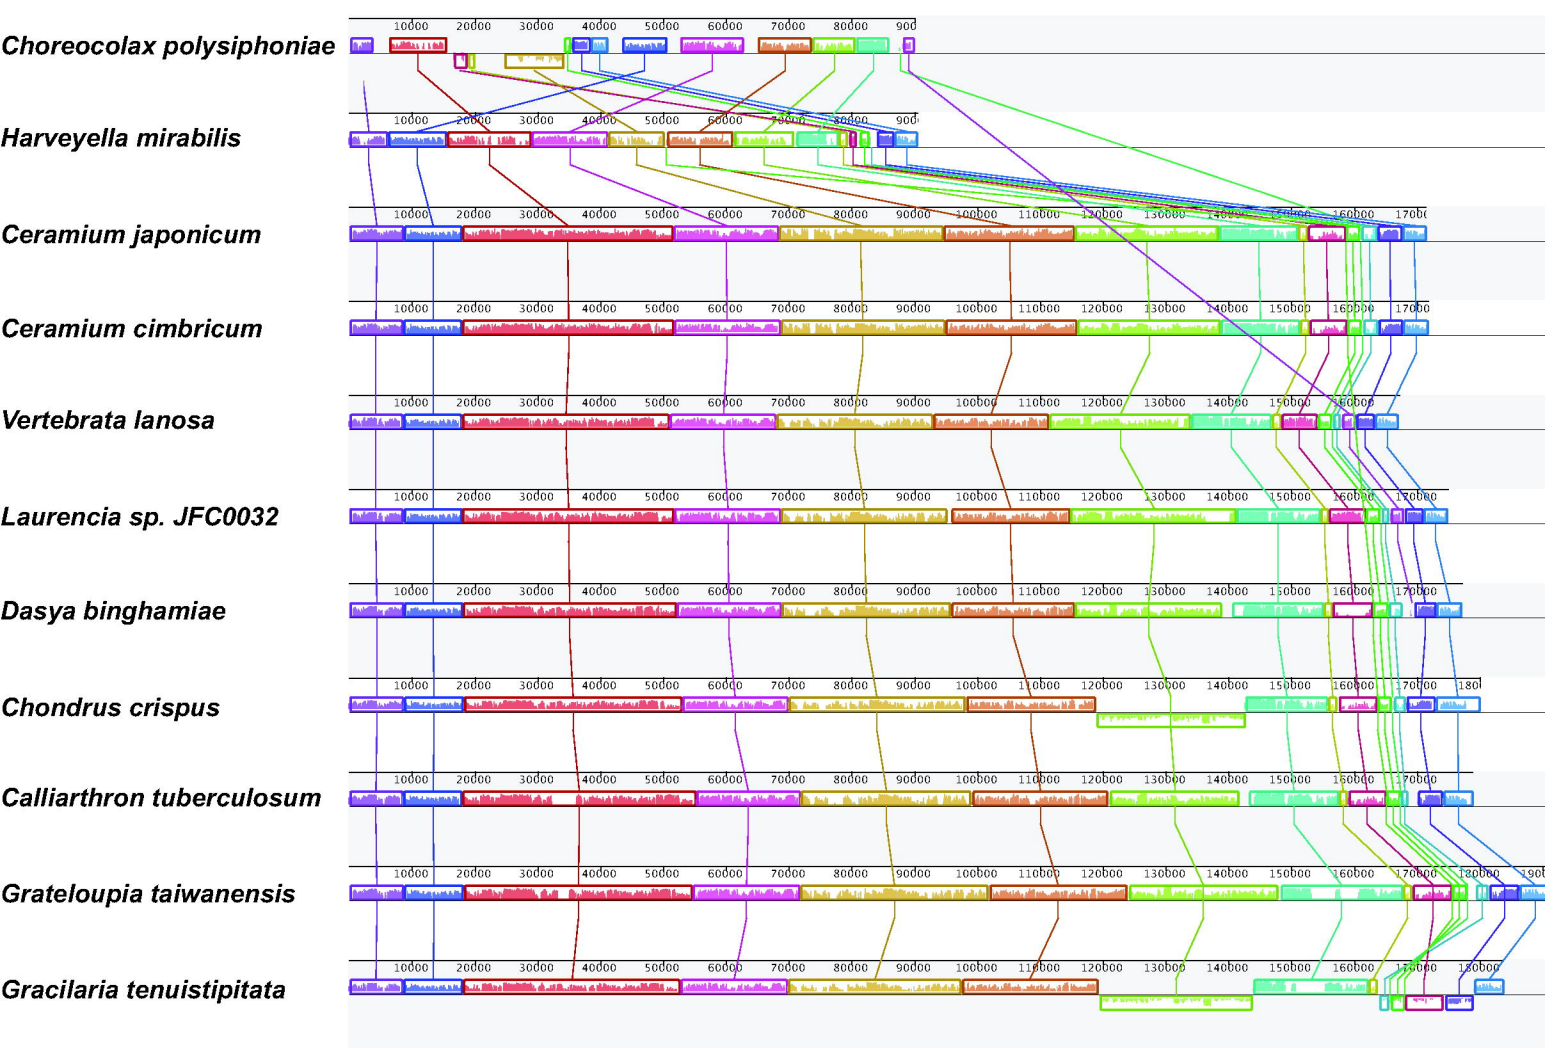

**Figure 3.** Mauve alignment of the parasites *Choreocolax polysiphoniae* (top) and *Harveyella mirabilis* (second from top) with all published Rhodomelaceae plastid genomes as well as those from select representatives of other Florideophyceae families (*Dasya binghamiae*, Dasyaceae; *Chondrus crispus*, Gigartinaceae; *Calliarthron tuberculosum*, Corallinaceae; *Grateloupia taiwanensis*, Halymeniaceae; *Gracilaria tenuistipitata*, Gracilariaceae). This alignment identifies 16 locally collinear blocks (LCBs) among the selected plastid genomes and demonstrates that even with the loss of photosynthesis genes overall synteny is shared between the parasite *H. mirabilis* and other plastid genomes, while *C. polysiphoniae* has undergone several genome rearrangements.

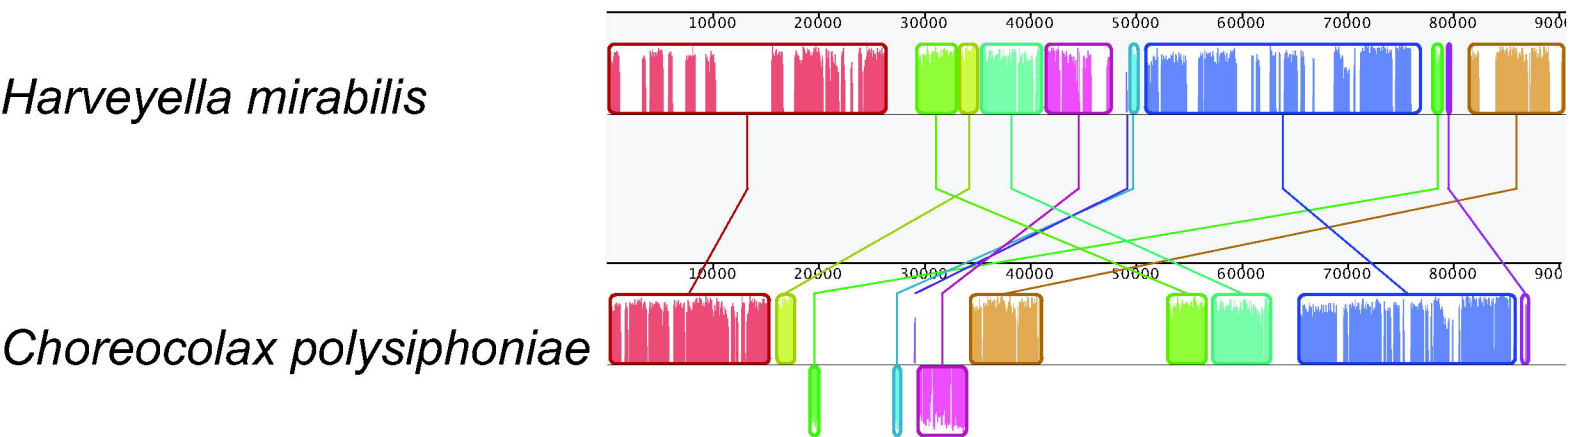

**Figure 4.** Mauve alignment of the plastid genomes from the parasites *Harveyella mirabilis* (top) and *Choreocolax polysiphoniae* (bottom). This alignment identifies 11 locally collinear blocks (LCBs) among these parasite plastid genomes, highlighting the high level of genome fragmentation and rearrangements evident in the two parasite plastids
